# Supplementary material for: Clinical association analysis of ependymomas and pilocytic astrocytomas reveals elevated FGFR3 and FGFR1 expression in aggressive ependymomas
Source: Springer Nature journal article supplement (doi:10.1186/s12885-017-3274-9), 2017-05-03
Supplement: MOESM1 [file 12262196]

**Supplementary Table S1.** Target regions for probe design for targeted sequencing. Coordinates were extracted using genome assembly GRCh37/hg19.

| Genomic region                | Target                                    |
|-------------------------------|-------------------------------------------|
| chr4:1,790,039-1,820,600      | FGFR3 locus                               |
| chr8:38,258,656-38,331,352    | FGFR1 locus                               |
| chr5:1,295,162-1,295,662      | TERT promoter (500 bp)                    |
| chr13:48,877,883-49,056,026   | RB1 exons                                 |
| chr21:17,911,328-17,911,570   | miR-99a locus                             |
| chr9:8,314,246-10,612,723     | PTPRD exons                               |
| chrX:76,937,000-76,940,142    | ATRX # exon 8                             |
| chrX:76,763,788-76,891,418    | ATRX # exons 16-end                       |
| chr8:38,585,704-38,710,546    | TACC1 exons                               |
| chr4:1,723,217-1,746,905      | TACC3 exons                               |
| chr9:21,967,751-21,994,490    | CDKN2A exons                              |
| chr10:89,623,195-89,728,532   | PTEN exons                                |
| chr3:178,916,614-178,952,152  | PIK3CA exons in coding region             |
| chr12:112,856,536-112,947,717 | PTPN11 exons                              |
| chr4:55,095,264-55,146,925    | PDGFRA exons                              |
| chr4:55,095,264-55,146,925    | MET exons                                 |
| chr17:7579650-7579750         | P53 # exon 3                              |
| chr17:7579300-7579600         | P53 # exon 4                              |
| chr17:7578350-7578570         | P53 # exon 5                              |
| chr17:7578150-7578300         | P53 # exon 6                              |
| chr17:7577480-7577630         | P53 # exon 7                              |
| chr17:7577000-7577180         | P53 # exon 8                              |
| chr17:7576840-7576940         | P53 # exon 9                              |
| chr17:7576520-7576680         | P53 # exon 10                             |
| chr17:7573910-7574050         | P53 # exon 11                             |
| chr2:209113040-209113190      | IDH1 # exon 4                             |
| chr15:90631790-90631940       | IDH2 # exon 4                             |
| chr11:65429530-65431330       | RELA # exons 1-3                          |
| chr7:140453090-140453190      | BRAF # exon 15                            |
| chr7:140481400-140494300      | BRAF # exons 8-11                         |
| chr7:55084974-55275667        | EGFR gene                                 |
| chr5:60003061-80002241        | CNA negative control region 1 (21 probes) |
| chr8:60001061-80002241        | CNA negative control region 2 (21 probes) |
| chr18:30000975-50001334       | CNA negative control region 3 (14 probes) |
| chr11:70001061-90005243       | CNA negative control region 4 (19 probes) |

**Supplementary Table 2.** Overview of targeted sequencing cohort and the obtained results (separate file)

a)

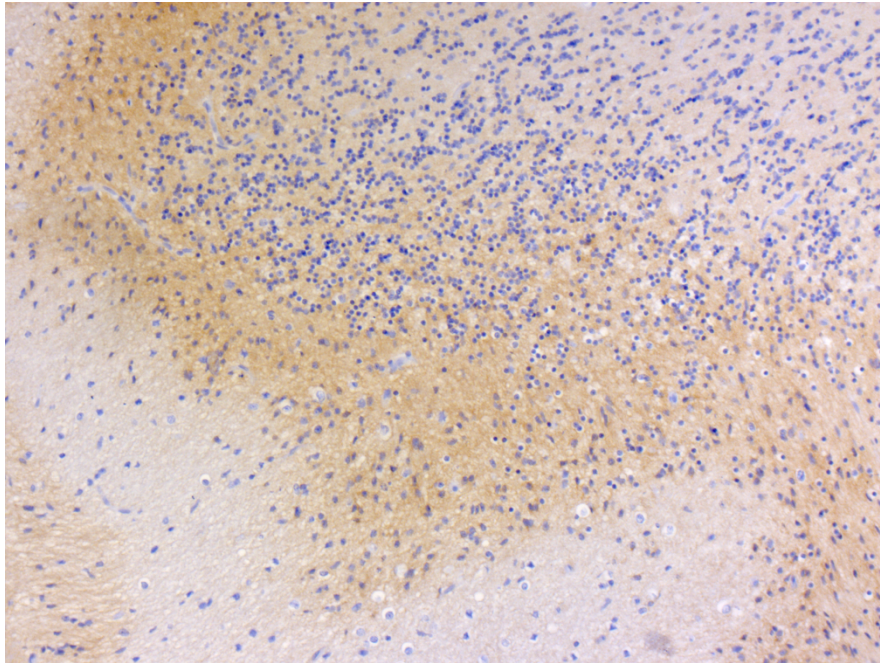

b)

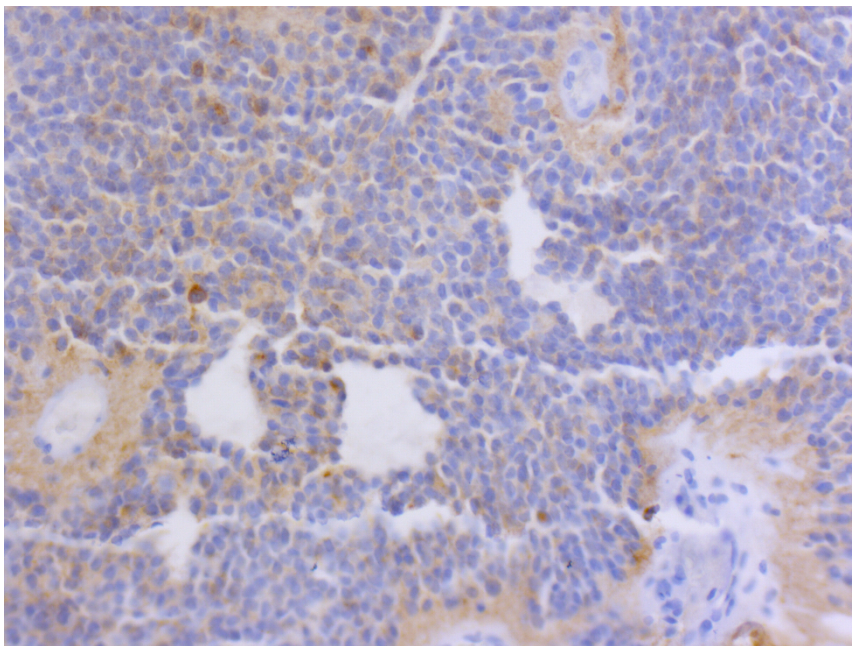

**Supplementary Figure S1.** a) Weak-to-moderate FGFR3 staining was observed in cerebellar molecular layer (100x magnification). b) FGFR3 staining in pseudorosette structures in ependymoma (200x magnification).

|              | sex                  | p53                 | spicerbra            | spinaivo             | prolif_class         | age_class            | fgfr3_class          | fgfr1_class2         | fgfr1                | fgfr3                | grade                | oper    |
|--------------|----------------------|---------------------|----------------------|----------------------|----------------------|----------------------|----------------------|----------------------|----------------------|----------------------|----------------------|---------|
| oper         | N = 112<br>p= 0.6305 | N = 63<br>p= 0.5432 | N = 110<br>p= 0.1232 | N = 110<br>p= 0.1104 | N = 105<br>p= 0.0076 | N = 112<br>p= 0.3174 | N = 108<br>p= 1      | N = 106<br>p= 0.2558 | N = 106<br>p= 0.2704 | N = 108<br>p= 0.7056 | N = 112<br>p= 0.0256 | N = 112 |
| grade        | N = 112<br>p= 0.2543 | N = 63<br>p= 0.0388 | N = 110<br>p= 0      | N = 110<br>p= 0      | N = 105<br>p= 0      | N = 112<br>p= 0.0141 | N = 108<br>p= 0.0125 | N = 106<br>p= 0.0024 | N = 106<br>p= 0.025  | N = 108<br>p= 0.0042 | N = 112              |         |
| fgfr3        | N = 108<br>p= 0.6757 | N = 61<br>p= 0.3805 | N = 106<br>p= 0      | N = 106<br>p= 0      | N = 101<br>p= 0.2137 | N = 108<br>p= 0.148  | N = 108<br>p= 0      | N = 103<br>p= 0.0126 | N = 103<br>p= 0.0497 | N = 108              |                      |         |
| fgfr1        | N = 106<br>p= 0.0671 | N = 63<br>p= 0.7447 | N = 104<br>p= 1e-04  | N = 104<br>p= 0.0023 | N = 102<br>p= 0.1452 | N = 106<br>p= 0.4999 | N = 103<br>p= 0.3383 | N = 106<br>p= 0      | N = 106              |                      |                      |         |
| fgfr1_class2 | N = 106<br>p= 0.0189 | N = 63<br>p= 0.5784 | N = 104<br>p= 1e-04  | N = 104<br>p= 0.0081 | N = 102<br>p= 0.0678 | N = 106<br>p= 0.0925 | N = 103<br>p= 0.1767 | N = 106              |                      |                      |                      |         |
| fgfr3_class  | N = 108<br>p= 0.6335 | N = 61<br>p= 1      | N = 106<br>p= 2e-04  | N = 106<br>p= 0.0011 | N = 101<br>p= 0.0702 | N = 108<br>p= 0.0801 | N = 108              |                      |                      |                      |                      |         |
| age_class    | N = 112<br>p= 0.9519 | N = 63<br>p= 0.2855 | N = 110<br>p= 0.0229 | N = 110<br>p= 0.006  | N = 105<br>p= 0.0124 | N = 112              |                      |                      |                      |                      |                      |         |
| prolif_class | N = 105<br>p= 0.907  | N = 62<br>p= 0.062  | N = 103<br>p= 0.1132 | N = 103<br>p= 0.0945 | N = 105              |                      |                      |                      |                      |                      |                      |         |
| spinaivo     | N = 110<br>p= 1      | N = 63<br>p= 0.1099 | N = 109<br>p= 0      | N = 110              |                      |                      |                      |                      |                      |                      |                      |         |
| spicerbra    | N = 110<br>p= 0.6729 | N = 63<br>p= 0.0059 | N = 110              |                      |                      |                      |                      |                      |                      |                      |                      |         |
| p53          | N = 63<br>p= 0.7917  | N = 63              |                      |                      |                      |                      |                      |                      |                      |                      |                      |         |
| sex          | N = 112              |                     |                      |                      |                      |                      |                      |                      |                      |                      |                      |         |

- p<.0001
- p<.001
- p<.01
- p<.05
- p>=.05

**Supplementary Figure 02.** Association analyses in the ependymoma cohort including all the cases. p-values were calculated using Fisher's exact test. Cut-off points for patient age classes were 20, 40, 60, and 80 years. In FGFR1 and FGFR3 class, cases were separated into high (moderate or strong staining) and low (negative or weak staining) classes. Oper: primary or recurrent tumor, p53: p53 IHC staining, spicerbra: tumor location (spinal, cerebellum, cerebrum), spinaivo: tumor location (spinal, brain), prolif\_class: proliferation index.

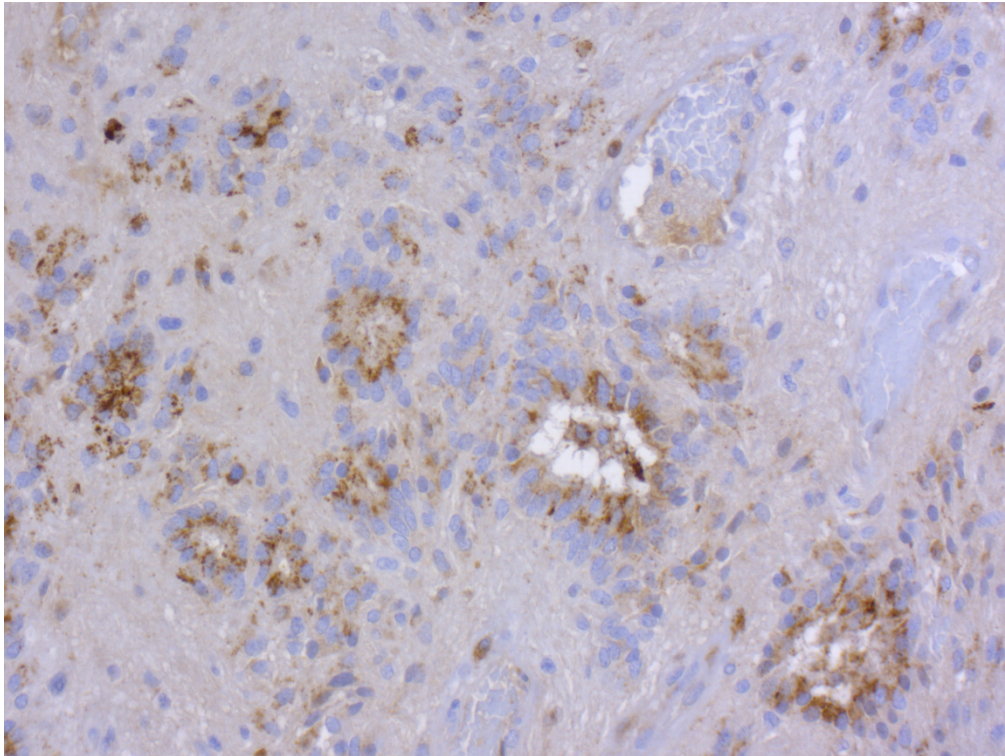

**Supplementary Figure S3.** Moderate-to-strong FGFR1 staining in endypmal rosettes.

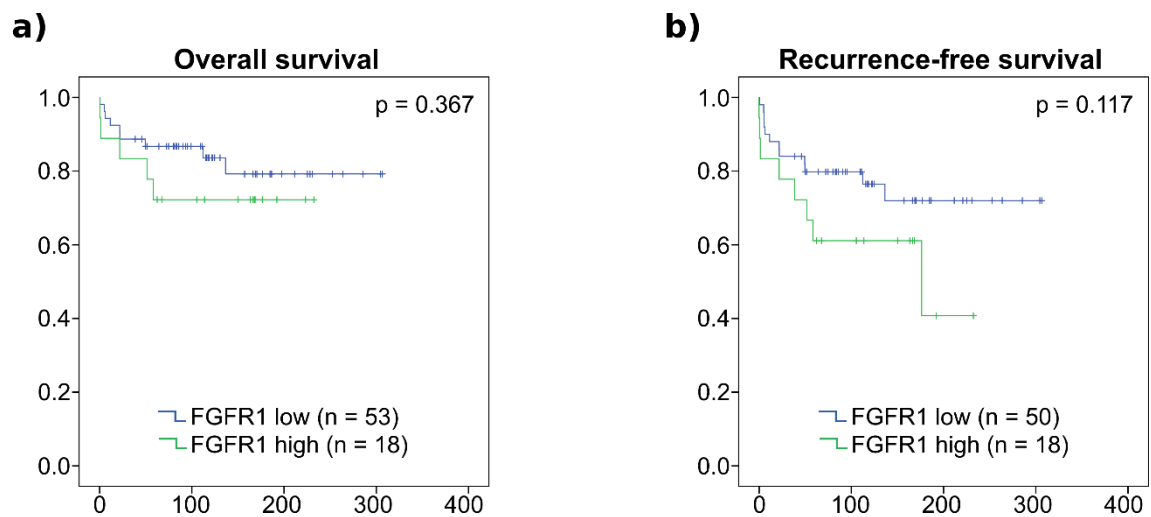

**Supplementary Figure S4.** Survival association analysis for FGFR1 staining in the endypmoma cohort was not statistically significant. a) Overall survival, b) Recurrence-free survival. Newly diagnosed cases were divided into two categories: low (negative-to-weak) or high (moderate-to-strong) FGFR1 staining.

|              | sex                   | p53                  | prolif_class          | age_class            | fgfr3_class          | fgfr1_class          | fgfr3                | fgfr1                | oper    |
|--------------|-----------------------|----------------------|-----------------------|----------------------|----------------------|----------------------|----------------------|----------------------|---------|
| oper         | N = 115<br>p = 0.857  | N = 77<br>p = 1      | N = 115<br>p = 0.1887 | N = 115<br>p = 1     | N = 79<br>p = 0.3153 | N = 96<br>p = 0.6959 | N = 79<br>p = 0.2369 | N = 96<br>p = 0.4382 | N = 115 |
| fgfr1        | N = 96<br>p = 0.3006  | N = 62<br>p = 0.1312 | N = 96<br>p = 0.4459  | N = 96<br>p = 0.2075 | N = 74<br>p = 0.3375 | N = 96<br>p = 0      | N = 74<br>p = 0.6328 | N = 96               |         |
| fgfr3        | N = 79<br>p = 0.7323  | N = 54<br>p = 1      | N = 79<br>p = 0.6162  | N = 79<br>p = 0.0104 | N = 79<br>p = 0      | N = 74<br>p = 0.7434 | N = 79               |                      |         |
| fgfr1_class  | N = 96<br>p = 0.298   | N = 62<br>p = 0.1414 | N = 96<br>p = 0.5643  | N = 96<br>p = 0.3211 | N = 74<br>p = 0.5808 | N = 96               |                      |                      |         |
| fgfr3_class  | N = 79<br>p = 1       | N = 54<br>p = 1      | N = 79<br>p = 0.182   | N = 79<br>p = 0.0026 | N = 79               |                      |                      |                      |         |
| age_class    | N = 117<br>p = 0.7691 | N = 77<br>p = 0.0906 | N = 117<br>p = 0.085  | N = 117              |                      |                      |                      |                      |         |
| prolif_class | N = 117<br>p = 0.6798 | N = 77<br>p = 0.2294 | N = 117               |                      |                      |                      |                      |                      |         |
| p53          | N = 77<br>p = 0.6831  | N = 77               |                       |                      |                      |                      |                      |                      |         |
| sex          | N = 117               |                      |                       |                      |                      |                      |                      |                      |         |

■ p < .0001  
■ p < .001  
■ p < .01  
■ p < .05  
■ p >= .05

**Supplementary Figure S5.** Association analyses in the pilocytic astrocytoma cohort including all the cases. p-values were calculated using Fisher's exact test. Cut-off points for patient age classes were 20, 40, 60, and 80 years. In FGFR1 and FGFR3 class, cases were separated into high (moderate or strong staining) and low (negative or weak staining) classes. Oper: primary or recurrent tumor, p53: p53 IHC staining, prolif\_class: proliferation index.



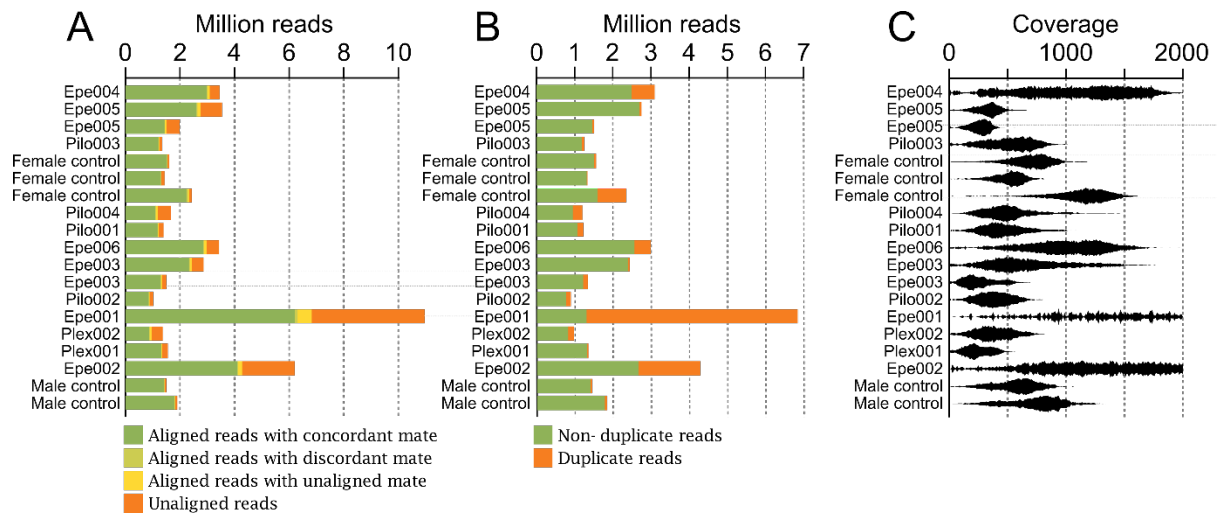

**Supplementary Figure S6.** Alignment and coverage statistics of the targeted sequencing cohort. (a) Total reads, grouped by alignment result. (b) Number of duplicate reads among all aligned reads. (c) Violin plot showing coverage distribution across all bases in target regions.
